# Supplementary material
Source: bioRxiv or medRxiv preprint supplement (https://medrxiv.org/highwire/filestream/68784/field_highwire_adjunct_files/0/19004937-1.pdf)
Supplement: Supplementary file [file 19004937-1.pdf]

# Supplementary Materials: A gene-diet interaction-based score predicts response to dietary fat in the Women’s Health Initiative

Table S1: Sample size necessary to achieve power of 0.8

| GxE variance explained (%) | N (nominal) | N (suggestive) | N (genome-wide) |
|----------------------------|-------------|----------------|-----------------|
| 0.05                       | 14046       | 49488          | 70866           |
| 0.10                       | 7021        | 24737          | 35423           |
| 0.50                       | 1401        | 4936           | 7069            |
| 1.00                       | 699         | 2461           | 3524            |

Power calculations were undertaken using the Quanto tool, with parameters set as follows: additive model, SNP main effect of 0.5% of trait variance, binary environment with 50% prevalence, and environmental effect explaining 10% of the trait variance.

Table S2: Responder score effects on CRF changes in DM trial participants across main-effect filter thresholds

| CRF   | N <sup>1</sup> | All variants        |                  |         | Nominal main effect (p<0.05) |                  |         | Suggestive main effect (p<1e-5) |                  |         |
|-------|----------------|---------------------|------------------|---------|------------------------------|------------------|---------|---------------------------------|------------------|---------|
|       |                | # SNPs <sup>2</sup> | SES <sup>3</sup> | P-value | # SNPs <sup>2</sup>          | SES <sup>3</sup> | P-value | # SNPs <sup>2</sup>             | SES <sup>3</sup> | P-value |
| BMI   | 1988           | 158365              | 0.049            | 0.026   | 6042                         | 0.027            | 0.221   | 569                             | 0.027            | 0.236   |
| FG    | 281            | 161906              | -0.078           | 0.495   | 1924                         | 0.016            | 0.791   | 7                               | 0.006            | 0.92    |
| HDL-C | 150            | 153942              | 0.028            | 0.63    | 1731                         | -0.06            | 0.471   | 42                              | 0.085            | 0.258   |
| LDL-C | 145            | 156313              | 0.035            | 0.729   | 1760                         | -0.179           | 0.026   | 46                              | 0.01             | 0.901   |
| SBP   | 2004           | 153942              | -0.016           | 0.473   | 1536                         | 0.029            | 0.196   | 6                               | 0                | 0.999   |
| TG    | 150            | 152006              | -0.184           | 0.203   | 1774                         | -0.139           | 0.066   | 47                              | -0.043           | 0.573   |

<sup>1</sup> Sample size available with 1-year follow-up for each CRF

<sup>2</sup> Number of SNPs selected by the pruning-and-thresholding algorithm for each CRF-threshold combination

<sup>3</sup> Standardized effect size (SES) represents the regression coefficient estimate in terms of CRF standard deviation per responder score standard deviation

Table S3: Responder score effects on CRF changes in DM trial participants across ancestries

| CRF   | All combined |                  |         | Black |                  |         | Hispanic |                  |         |
|-------|--------------|------------------|---------|-------|------------------|---------|----------|------------------|---------|
|       | N            | SES <sup>1</sup> | P-value | N     | SES <sup>1</sup> | P-value | N        | SES <sup>1</sup> | P-value |
| BMI   | 3606         | -0.02            | 0.24    | 1214  | 0                | 0.994   | 404      | 0.018            | 0.719   |
| FG    | 572          | 0.08             | 0.043   | 214   | -0.004           | 0.955   | 77       | -0.014           | 0.901   |
| HDL-C | 430          | -0.06            | 0.224   | 206   | -0.096           | 0.182   | 74       | -0.057           | 0.66    |
| LDL-C | 422          | 0.084            | 0.066   | 206   | 0.055            | 0.412   | 71       | 0.126            | 0.227   |
| SBP   | 3645         | 0.041            | 0.015   | 1230  | 0                | 0.991   | 411      | -0.008           | 0.868   |
| TG    | 430          | -0.075           | 0.112   | 206   | -0.023           | 0.743   | 74       | -0.098           | 0.433   |

<sup>1</sup> Standardized effect size (SES) represents the regression coefficient estimate in terms of CRF standard deviation per responder score standard deviation

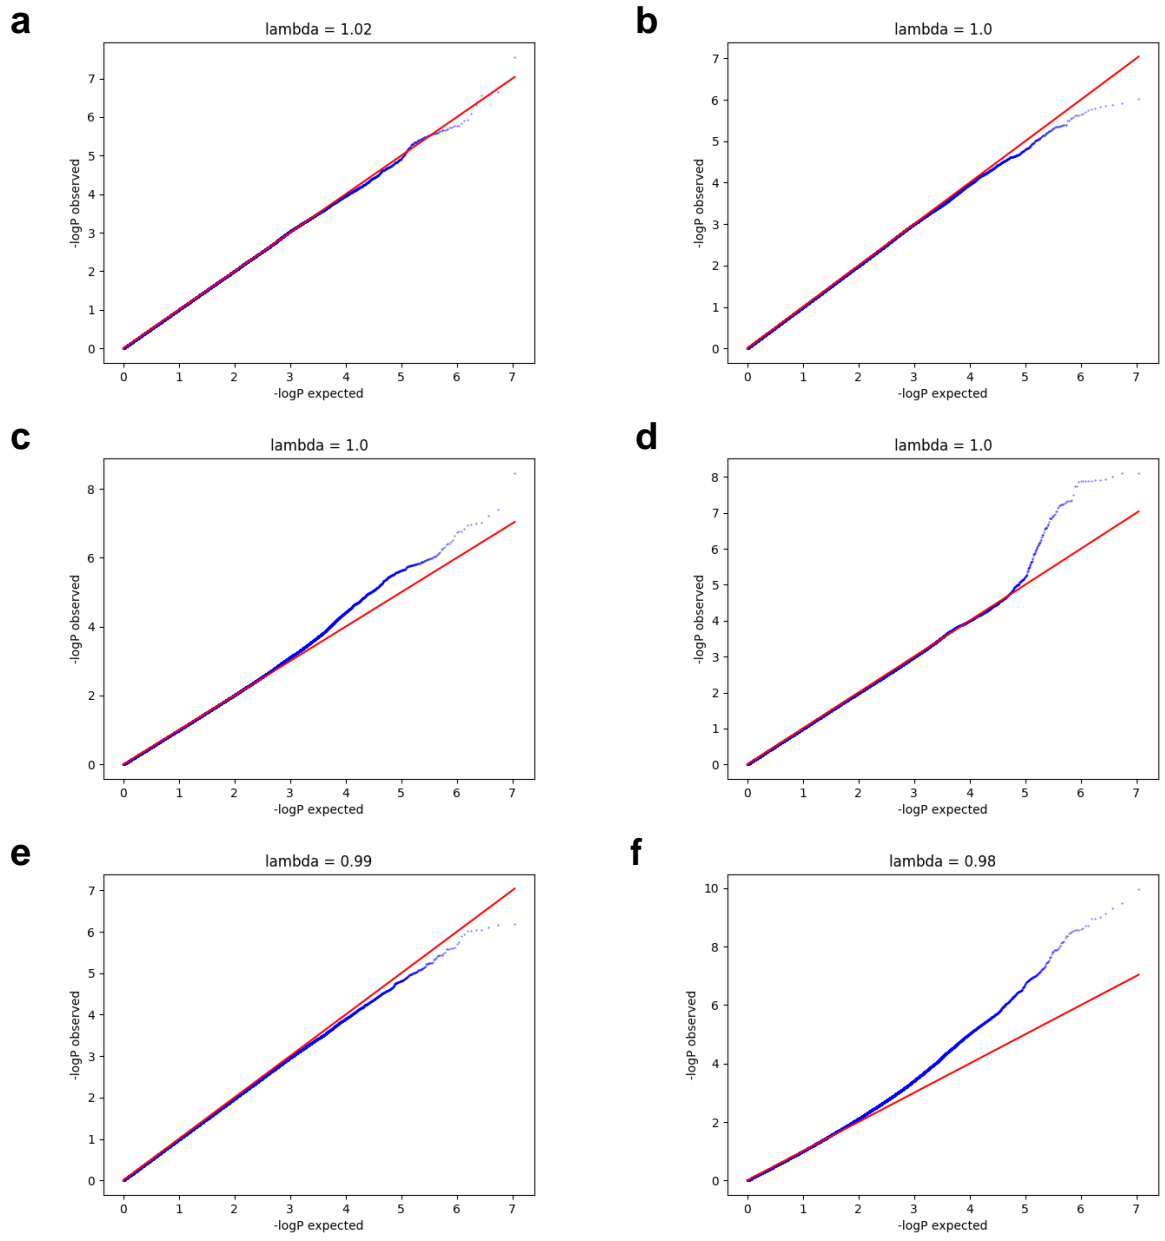

Figure S1: Q-Q plots from individual CRF GWIS. The distribution of p-values from each GWIS is plotted against the expected uniform p-value distribution. Plots correspond to: a) BMI, b) SBP, c) LDL-C, d) HDL-C, e) TG, and f) FG.

Table S4: LDL-FRS effects on alternate CRF changes in DM trial participants

| Outcome risk factor | # SNPs in risk score | Sample size | Std. effect size <sup>1</sup> | P-value |
|---------------------|----------------------|-------------|-------------------------------|---------|
| BMI                 | 1747                 | 1988        | -0.02                         | 0.36    |
| SBP                 | 1747                 | 2004        | 0.00                          | 0.83    |
| HDL-C               | 1747                 | 150         | -0.07                         | 0.39    |
| TG                  | 1747                 | 150         | 0.11                          | 0.16    |
| FG                  | 1747                 | 281         | 0.01                          | 0.82    |

<sup>1</sup> Std. effect size represents the regression coefficient estimate in terms of CRF standard deviation per responder score standard deviation
